# Supplementary material for: Synergistic effects of XPO1 inhibitors combined with CD19 CAR-T cells in TP53-mutated DLBCL
Source: Research Square preprint supplement (doi:10.21203/rs.3.rs-5946503/v1), 2025-04-21

## **Institutional review board statement**

The clinical features, treatment and blood samples of the enrolled patients were taken after informed consent. And the study was reviewed and approved by the Affiliated Hospital of Nantong University Institutional Review Board.

Ethics Committee of Affiliated Hospital of Nantong University

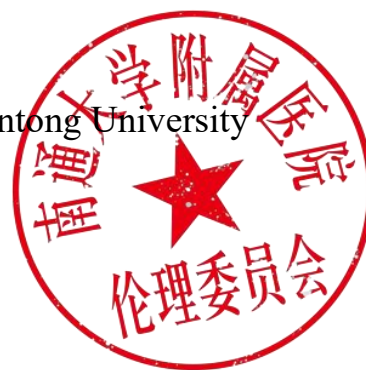

Supplement: Supplementary file 1 [file 5bf2645dbc4a0d11c6a9d4ac.pdf]
