# Supplementary material for: Synergistic effects of XPO1 inhibitors combined with CD19 CAR-T cells in TP53-mutated DLBCL
Source: Research Square preprint supplement (doi:10.21203/rs.3.rs-5946503/v1), 2025-04-21
Supplement: Supplementary file 2 [file f4dc6eeb4d84333cb48c8d41.pdf]

伦理审查同意函(课题申报)

审查编号：2024-L034

|                                                                                                                                                                                                                                                                                                                                                                                        |                                                                                     |
|----------------------------------------------------------------------------------------------------------------------------------------------------------------------------------------------------------------------------------------------------------------------------------------------------------------------------------------------------------------------------------------|-------------------------------------------------------------------------------------|
| 研究项目名称                                                                                                                                                                                                                                                                                                                                                                                 | XP01 抑制 CAR-T 治疗后 TP53 突变的弥漫大 B 细胞淋巴瘤复发的机制研究                                        |
| 项目来源                                                                                                                                                                                                                                                                                                                                                                                   | 国自然申报立项前审查                                                                          |
| 研究科室/部门                                                                                                                                                                                                                                                                                                                                                                                | 血液内科                                                                                |
| 项目负责人                                                                                                                                                                                                                                                                                                                                                                                  | 白志敏                                                                                 |
| 伦理审查方式                                                                                                                                                                                                                                                                                                                                                                                 | <input type="checkbox"/> 会议审查 <input checked="" type="checkbox"/> 快速审查              |
| 审查意见                                                                                                                                                                                                                                                                                                                                                                                   | 1. 经本伦理委员会审查， <b>同意</b> 该项目申报。<br>2. 该项目申报成功后，在项目实施前需要再次递交伦理进行审查。                   |
| <p><b>注意事项：</b></p> <p>1. 此批件仅作为同意申报项目使用，不作为批准项目实施的证明，项目申报成功后需要重新递交伦理委员会进行审查。</p> <p>2. 项目的设计与实施必须符合 CFDA/GCP 和《赫尔辛基宣言》的原则。</p> <p>3. 暂停/终止研究请及时通知伦理委员会。</p> <p>4. 研究过程中若变更主要研究者，对临床研究方案、知情同意书、招募材料等的任何修改，必须及时报告伦理委员会审批。</p> <p>5. 发生严重不良事件、违背方案事件及影响研究风险受益比的非预期事件，及时报告伦理委员会。</p> <p>6. 请按照伦理委员会规定的年度/定期跟踪审查频率，无论研究开始与否，请在截止日期前 1 个月提交研究进展报告。</p> <p>7. 完成临床研究，必须提交研究完成报告供伦理委员会审查。</p> |                                                                                     |
| 主任委员签字                                                                                                                                                                                                                                                                                                                                                                                 |  |
| 伦理委员会                                                                                                                                                                                                                                                                                                                                                                                  | 南通大学附属医院伦理委员会                                                                       |
| 日期                                                                                                                                                                                                                                                                                                                                                                                     | 2024 年 03 月 01 日                                                                    |

伦理委员会联系电话：0513-85052390； E-mail: [lunlib@126.com](mailto:lunlib@126.com)
